# Supplementary material for: The Fur Transcription Regulator and Fur‐Regulated Genes in Clostridium botulinum A ATCC 3502
Source: Hindawi journal article supplement (doi:10.1155/2011/934756), 2011-01-01
Supplement: f1 [file 934756.f1.docx]

**Figure S1.** The logo of Fur binding sites in *Clostridium botulinum* A ATCC 3502.


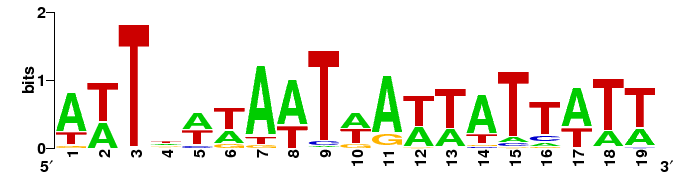


**Table S1. The putative association genes of Fur binding sites in *Clostridium botulinum* A ATCC 3502**

| **Fur binding sites** | **Gene** | **Description** |
| --- | --- | --- |
| **Iron acquisition** | | |
| AATGATAATGATTATTAAA | CBO2610 | DedA family membrane protein |
| CBO2611 | DedA family membrane protein |
| CBO2612 | iron-sulfur protein |
| CBO2613 | hypothetical protein |
| CBO2614 | glycosyl transferase |
| ATTTAGAACAGTATTTATA | CBO0203 | iron binding protein |
| AATGTTAAGGGTTATTTTA | buk1 | butyrate kinase |
| ptb2 | phosphate butyryltransferase |
| buk2 | butyrate kinase |
| CBO3429 | hypothetical protein |
| CBO3430 | exported protein |
| CBO3431 | hypothetical protein |
| trxC | thioredoxin |
| iadA | isoaspartyl dipeptidase |
| CBO3436 | TPR-repeat-containing protein |
| CBO3437 | lipoprotein |
| ptsI | phosphoenolpyruvate-protein phosphotransferase |
| fumA' | fumarate hydratase, subunit B |
| fumA | fumarate hydratase |
| AATTTTAATGATTTATAAT | CBO2861 | sulfatase |
| CBO2862 | membrane protein |
| ribA | riboflavin biosynthesis protein |
| ATTGCTATTACAAATTTAT | CBO0852 | NAD(P)H dehydrogenase |
| CBO0853 | iron-sulfur flavoprotein |
| ATTCATATTATTTATAATT | CBO2219 | hydrogenase nickel incorporation protein |
| CBO2220 | hydrogenase isoenzyme nickel incorporation protein |
| CBO2222 | 4Fe-4S cluster, ATPase protein |
| CBO2223 | 4Fe-4S cluster, ATPase protein |
| CBO2224 | dinitrogenase iron-molybdenum cofactor protein |
| **Iron utilization** | | |
| ATTGATAATTATTAATATA | CBO3371 | oxidoreductase |
| pyk | pyruvate kinase |
| pfkA | 6-phosphofructokinase |
| AATACAAATAAATACTATA | nifJ1 | pyruvate-flavodoxin oxidoreductase |
| TATGAAAATAGTTATTAAT | CBO3119 | FMN-dependent dehydrogenase |
| GTTGAAAATAATTTTTATA | CBO3421 | subunit of pyruvate:flavodoxin oxidoreductase |
| CBO3422 | subunit of pyruvate:flavodoxin oxidoreductase |
| CBO3423 | 2-ketoisovalerate ferredoxin reductase |
| CBO3424 | flavodoxin oxidoreductase |
| CBO3425 | hypothetical protein |
| ATATATAATTATTATTAAA | CBO3304 | putative oxidoreductase |
| pyrK2 | ferredoxin--NADP(+) reductase subunit alpha |
| AATGAAAATTGAAAACTTT | proC | pyrroline-5-carboxylate reductase |
| CBO3183 | pyruvate formate lyase |
| CBO3184 | pyruvate formate-lyase 2 activating enzyme |
| ATTTCTATTTATAATTATT | hymC | catalytic subunit of iron-only hydrogenase |
| hymB | iron-only hydrogenase |
| hymA | iron-only hydrogenase |
| TTTCAAATTTAAACTGATT | CBO2141 | putative oxidoreductase |
| GTTCACTTTAAATATTATT | CBO2819 | dihydropyrimidine dehydrogenase |
| CBO2820 | Pyridine nucleotide-disulphide oxidoreductase |
| **Iron transport** | | |
| ATTTTAAATTATTGTTATA | CBO0301 | iron(III)-binding periplasmic protein |
| CBO0302 | iron(III) transport system, permease protein |
| CBO0303 | iron(III) transport system, ATP-binding protein |
| CBO0304 | drug/sodium antiporter |
| AAAACGAATAATTATTTTA | feoA | ferrous iron transport protein A |
| ATTATTATTAAATAACATT | CBO0445 | ABC transport system, membrane component |
| CBO0446 | ABC transport system, permease component |
| TATCTTATTAATTATTTTT | CBO0445 | ABC transport system, membrane component |
| CBO0446 | ABC transport system, permease component |
| ATTAATATTAAATATATTT | CBO0459 | membrane protein |
| CBO0460 | membrane protein |
| TTTTTTAATAAATCTTTAT | CBO0627 | ABC transporter, ATP-binding protein |
| CBO0628 | membrane protein |
| TTTCTGTTTTGTAATCATT | CBO0845 | ABC transporter, membrane protein |
| CBO0846 | ABC transporter, ATP-binding protein |
| CBO0847 | DNA-binding protein |
| TATCTTATTAAAAATTATT | CBO0874 | membrane protein |
| CBO0875 | membrane protein |
| AATAAGAATAAAAGCTATC | CBO1952 | ABC transporter, ATP-binding/permease protein |
| CBO1953 | ABC transporter, ATP-binding/permease protein |
| AATTAGTATACTTATTTTT | CBO1064 | membrane protein |
| TTTCTTTATAAAAATTATA | CBO1061 | membrane-associated protease |
| CBO1062 | metallo-beta-lactamase superfamily protein |
| TTTATAAATAAAACTTATT | CBO1545 | calcium-transporting ATPase |
| ATTCATATTTCACATTATA | CBO1950 | ABC transporter, ATP-binding protein |
| CBO1951 | ABC transporter permease protein |
| ATTTAAAATGAATATTTTA | CBO2890 | hypothetical protein |
| CBO2891 | hypothetical protein |
| CBO2892 | hypothetical protein |
| CBO2893 | xanthine dehydrogenase accessory protein |
| CBO2894 | hypothetical protein |
| CBO2895 | ABC transporter, permease protein |
| CBO2896 | ABC transporter, ATP-binding protein |
| CBO2897 | ABC transporter, substrate-binding protein |
| CBO2898 | membrane protein |
| TATGTTAATTATACTTATC | CBO1545 | calcium-transporting ATPase |
| **Transcription regulator** |  |  |
| TATTATAATACTACTTATA | CBO3196 | sigma54-binding transcriptional regulator |
| ATTTTTAATTATATTTATA | CBO0895 | transcriptional regulator |
| CBO0896 | membrane protein |
| AATGTATTTAGTTAATATT | CBO1193 | TetR-family transcriptional regulator |
| CBO1194 | Na(+)/H(+) antiporter |
| AATATATATAGTTATTATA | CBO1248 | transcriptional regulator |
| AATGAAAATGCATATTAAT | CBO1924 | two-component response regulator |
| TTTAAGGATGATTCTAATA | CBO2125 | MerR-family transcriptional regulator |
| CBO2126 | propanediol utilization: propanol dehydrogenase |
| ATAGAAAAAAATTATTATT | CBO2135 | two-component sensor kinase |
| CBO2136 | two-component system response regulator |
| CBO2137 | membrane protein |
| CBO2138 | membrane protein |
| CBO2139 | ABC transporter, ATP-binding protein |
| AATGTAAAAAAATATCATT | CBO2163 | hypothetical protein |
| CBO2164 | AraC family regulatory protein |
| ATATAAAATTCTTATTATT | CBO2823 | MarR-family transcriptional regulator |
| CBO2824 | antibiotic/drug resistance ABC transporter |
| ATTAATAATAAAAGTAATT | pemK | regulator of cell growth |
| CBO3396 | CopG-family transcriptional regulator |
| alr | alanine racemase |
| CBO3398 | exported protein |
| **Unclassified** | | |
| AATATAAATTAATTTTATT | cheD | flagellar motor switch protein |
| fliM | flagellar motor switch protein FliM |
| CBO2745 | chemotaxis protein |
| cheB | chemotaxis protein cheY homologue |
| cheC | chemotaxis protein CheC |
| cheA | chemotaxis protein CheA |
| cheR | chemotaxis protein methyltransferase |
| cheB | chemotaxis response regulator protein |
| cheD | chemotaxis protein CheD |
| cheW | chemotaxis protein CheW |
| CBO2753 | hypothetical protein |
| TATATAAATTAATATTTTT | CBO2226 | chemotaxis MotB protein |
| CBO2227 | flagellar motor protein MotA |
| ATTCAAATTGAATATAAAA | flgG | flagellar basal body rod protein FlgG |
| flgG | flagellar basal body rod protein FlgG |
| CBO2639 | hypothetical protein |
| CBO2640 | hypothetical protein |
| sigD | RNA polymerase sigma factor |
| CBO2642 | hypothetical protein |
| CBO2643 | ParA family ATPase |
| flhF | flagellar biosynthesis regulator FlhF |
| flhA | flagellar biosynthesis protein A |
| CBO2646 | flagellar biosynthesis protein FliR/FlhB |
| fliQ | flagellar biosynthetic protein |
| fliP | flagellar biosynthesis protein FliP |
| CBO2649 | flagellar biosynthesis protein |
| fliL | flagellar basal body-associated protein |
| motB | chemotaxis MotB protein |
| motA | chemotaxis MotA protein |
| CBO2653 | flagellar protein |
| flgE | flagellar hook protein |
| CBO2655 | flagellar protein |
| flgD | flagellar hook assembly protein |
| CBO2657 | flagellar hook-length control protein |
| fliJ | flagellar protein |
| fliI | flagellum-specific ATP synthase |
| fliH | flagellar assembly protein |
| fliG | flagellar motor switch protein G |
| fliF | flagellar MS-ring protein |
| fliE | flagellar hook-basal body protein FliE |
| flgC | flagellar basal body rod protein FlgC |
| flgB | flagellar basal body rod protein FlgB |
| GATATAAATAAATATATTT | ftsZ | cell division protein FtsZ |
| divA | cell division protein FtsA |
| TTTTATATTAAAAATTTTA | ftsS | cell division protein |
| ftsE | cell division ATP-binding protein |
